# Supplementary material for: The effects of silk layer-by-layer surface modification on the mechanical and structural retention of extracellular matrix scaffolds
Source: Royal Society of Chemistry journal article supplement (doi:10.1039/d0bm00448k), 2020-01-01
Supplement: d0bm00448k1.pdf [file d0bm00448k1.pdf]

## Supplemental information

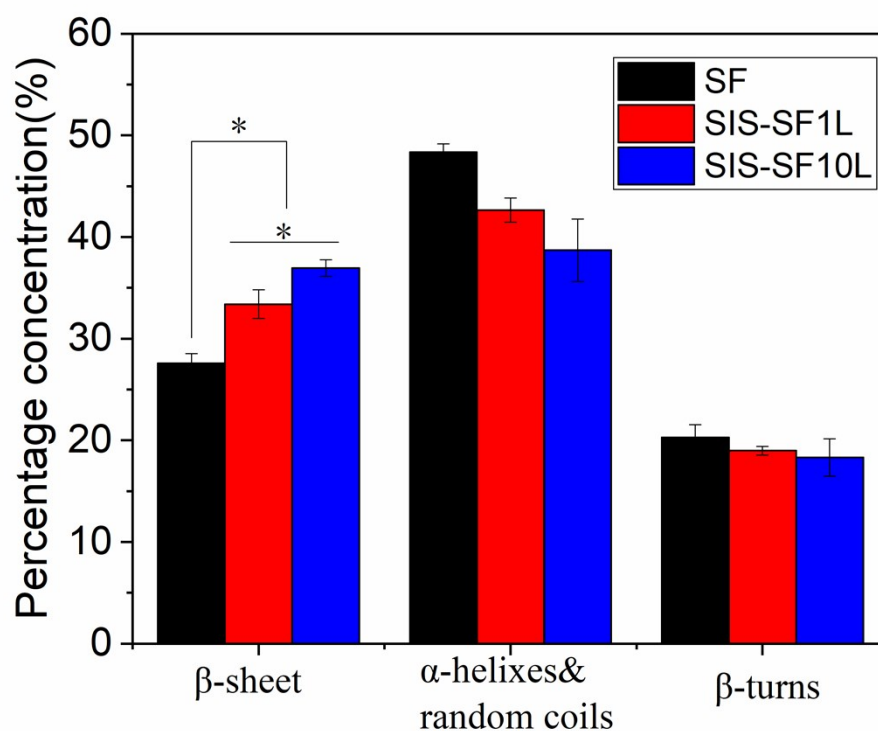

Fig.S1. The contents of different secondary structures in Amide I region of SF, SIS-SF1L, SIS-SF10L.

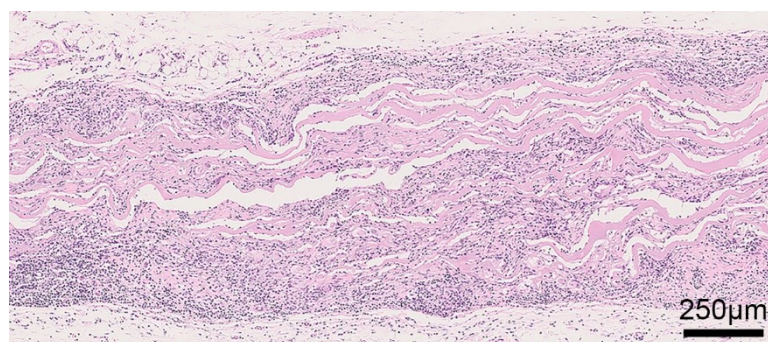

Fig.S2. Representative image of the H&E staining of sections of SIS membrane after 2 weeks of subcutaneous implantation.

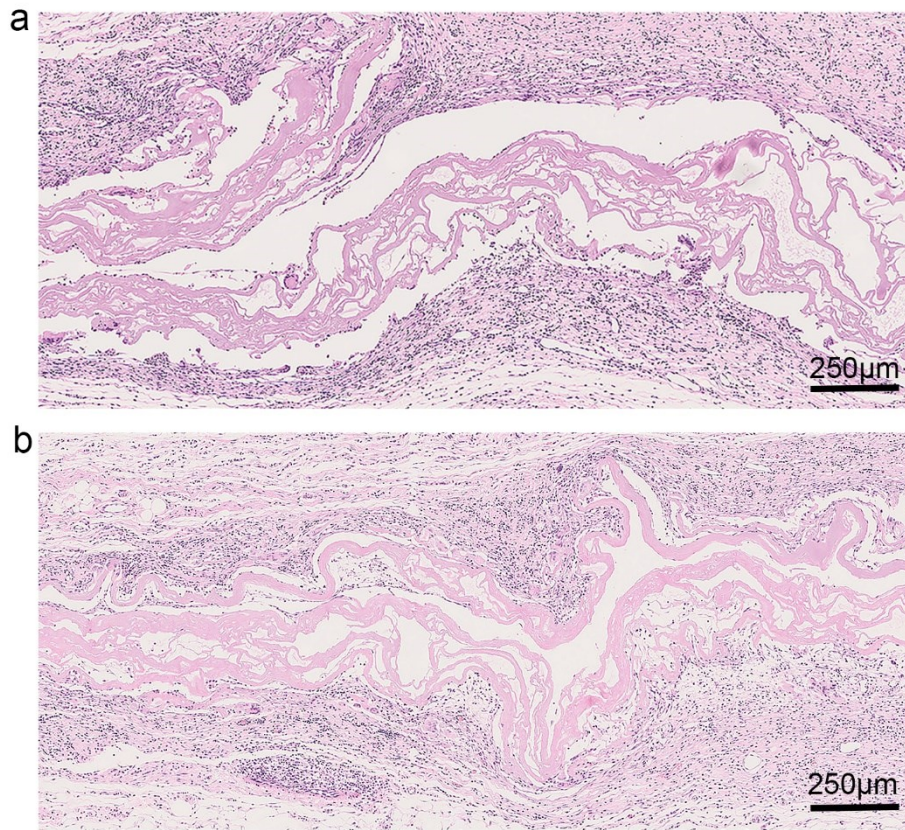

Fig.S3. Representative image of the H&E staining of sections of SIS-SF membranes after 2 weeks of subcutaneous implantation. (a) Representative image of the H&E staining of sections of SIS-SF1 membrane. (b) Representative image of the H&E staining of sections of SIS-SF10 membrane.
